# Supplementary material
Source: Springer Nature journal article supplement (https://www.springermedizin.de/resource/supplementary/13019_2011_494_MOESM1_ESM.pdf/9638430)
Supplement: MOESM1 [file 9638430]

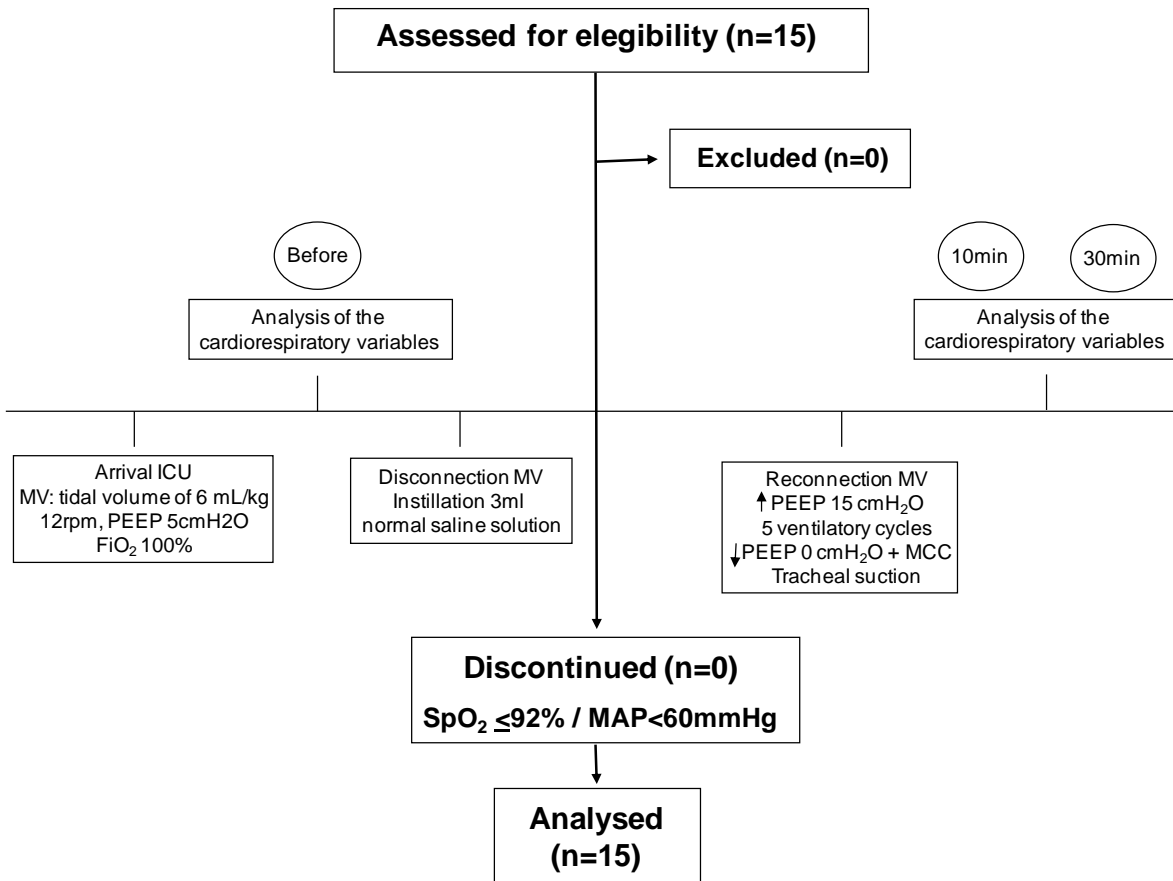

ICU: Intensive Care Unit; MV: mechanical ventilation; MAP: mean arterial pressure; MCC: manual chest compression.
